# Supplementary material for: Highly efficient blue emitting one dimensional lead-free nanocrystals
Source: Royal Society of Chemistry journal article supplement (doi:10.1039/d2tc01591a), 2022-01-01
Supplement: d2tc01591a1.pdf [file d2tc01591a1.pdf]

## Supporting Information

### **Highly Efficient Blue Emitting One Dimensional Lead-Free Nanocrystals**

*Jianing Duan, Jun Xi\*, Bo Jiao, Jinfei Dai, Yanqing Zu and Zhaoxin Wu\**

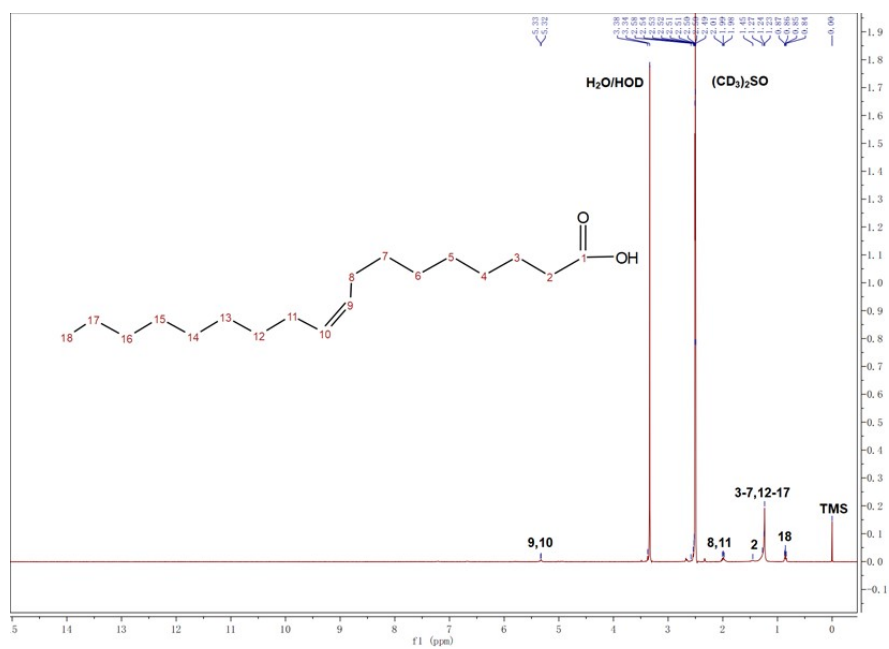

Figure S1.  $^1\text{H}$  NMR spectra of  $\text{Cs}_5\text{Cu}_3\text{Cl}_6\text{l}_2$  NCs dissolved in  $(\text{CD}_3)_2\text{SO}$ .

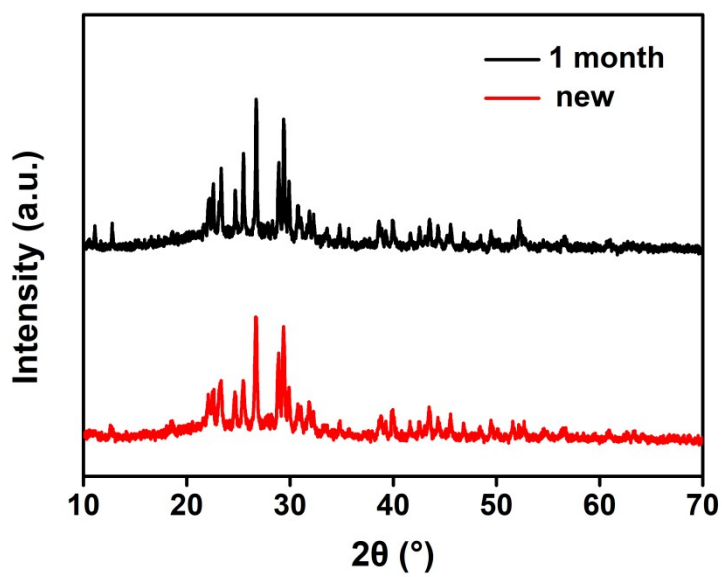

Figure S2. XRD patterns of  $\text{Cs}_5\text{Cu}_3\text{Cl}_6\text{l}_2$  powders stored in the air for 0 day and 1 month.

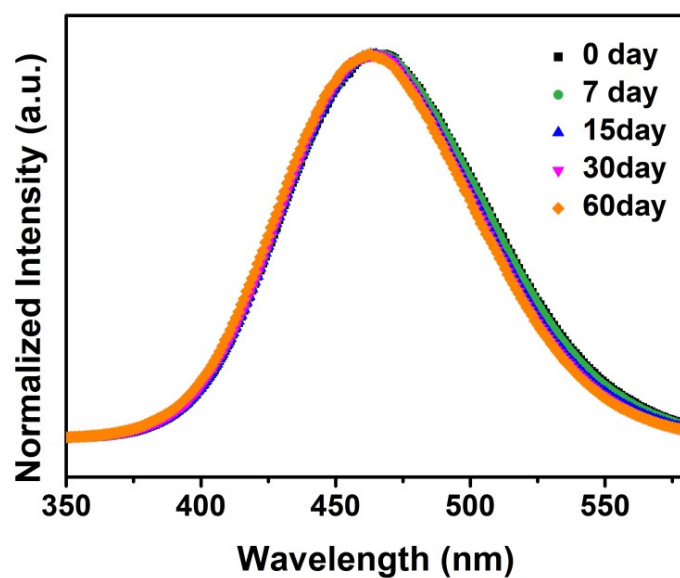

**Figure S3.** PL spectra of  $\text{Cs}_5\text{Cu}_3\text{Cl}_6\text{I}_2$  colloidal NCs stored in ambient condition for different time.

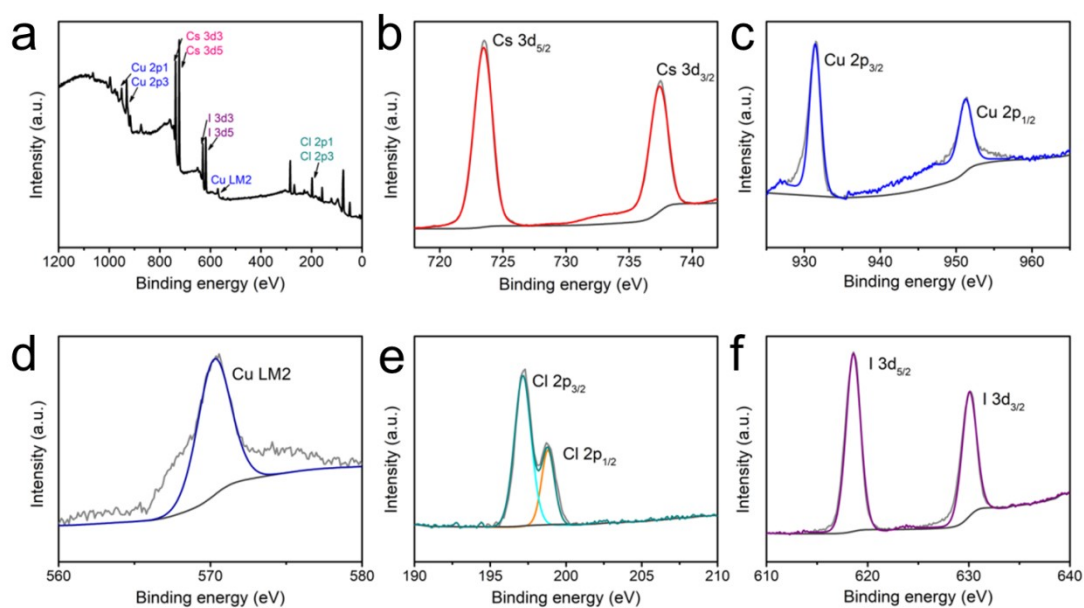

**Figure S4.** (a) X-ray photoelectron spectroscopic (XPS) analysis of  $\text{Cs}_5\text{Cu}_3\text{Cl}_6\text{I}_2$  NCs powders and the high-resolution spectra of (b) Cs 3d; (c) Cu 2p; (d) Cu LM2; (e) Cl 2p; (f) I 3d.

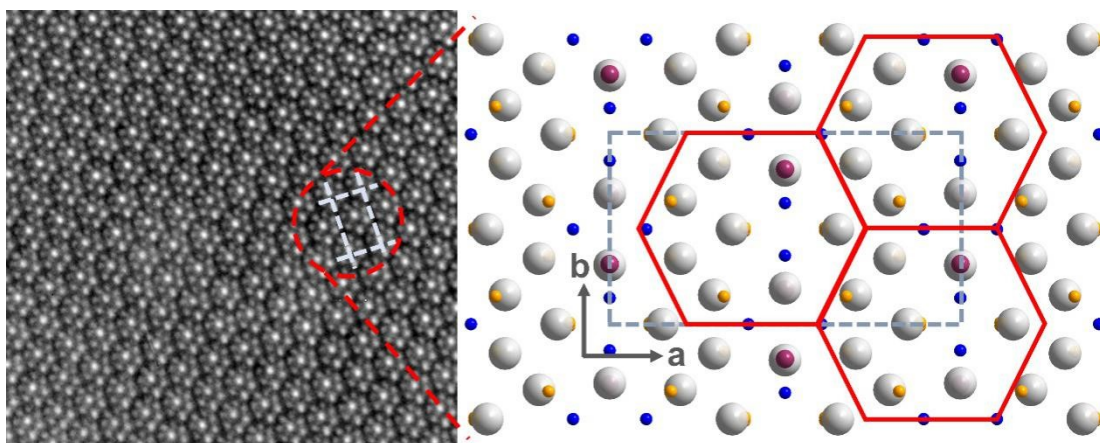

**Figure S5.** The transmission electron microscopy image of  $\text{Cs}_5\text{Cu}_3\text{Cl}_6\text{I}_2$  NCs (right: projected view of (001) lattice planes; Gray, blue, yellow and purple spheres represent Cs, Cu, Cl and I atoms, respectively).

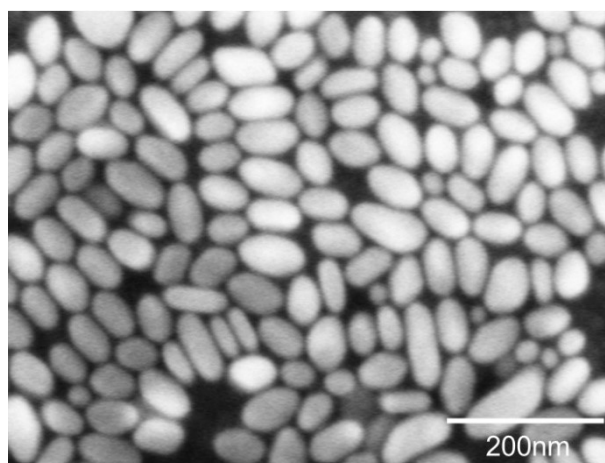

**Figure S6.** The scanning electron microscopy image of  $\text{Cs}_5\text{Cu}_3\text{Cl}_6\text{I}_2$  NCs coated on ITO substrate.

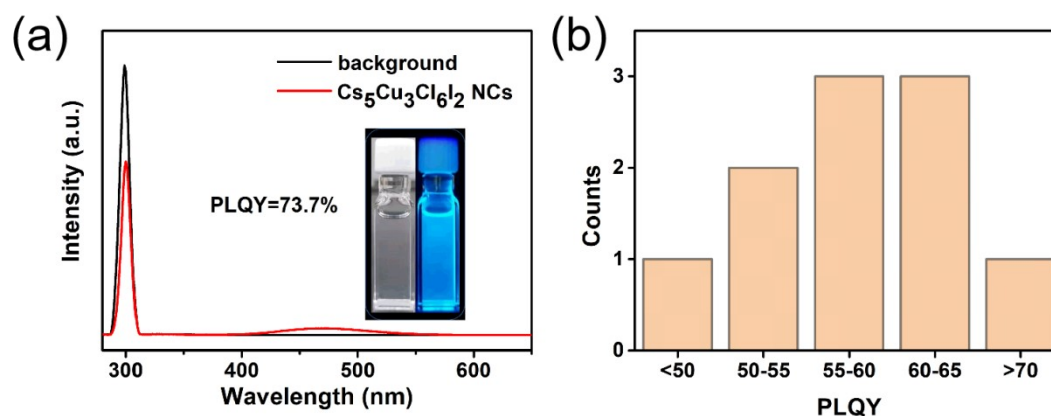

**Figure S7.** (a) PLQY and corresponding sample with and without excitation by UV light of  $\text{Cs}_5\text{Cu}_3\text{Cl}_6\text{I}_2$  NCs. (b) The value of PLQY distribution histogram of as-prepared samples.

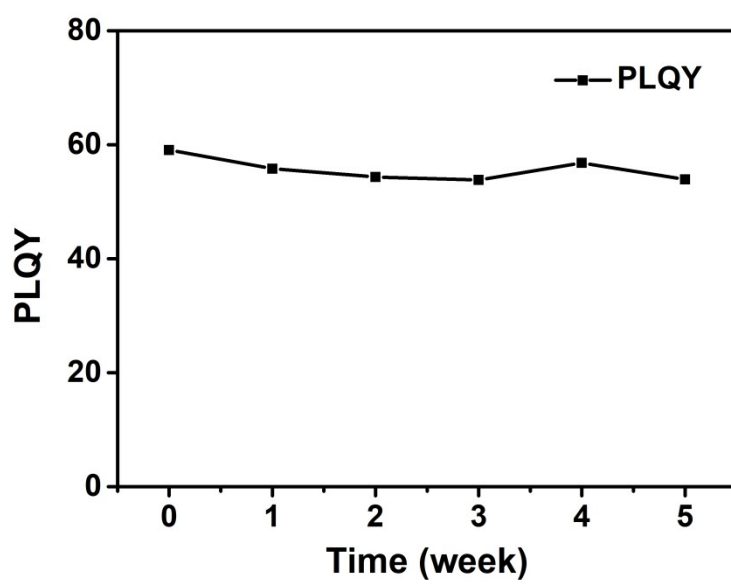

Figure S8. Plot of PLQYs over time for  $\text{Cs}_5\text{Cu}_3\text{Cl}_6\text{I}_2$  NCs.

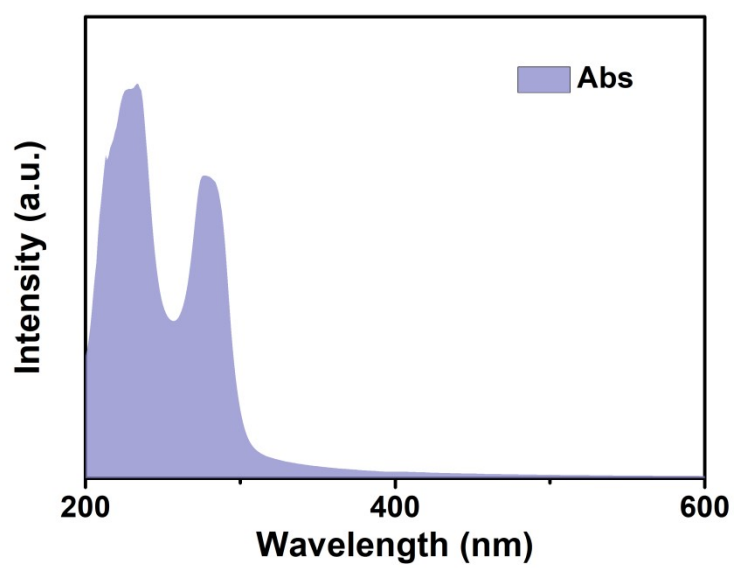

Figure S9. The UV/Vis absorption spectra of  $\text{Cs}_5\text{Cu}_3\text{Cl}_6\text{I}_2$  NCs.

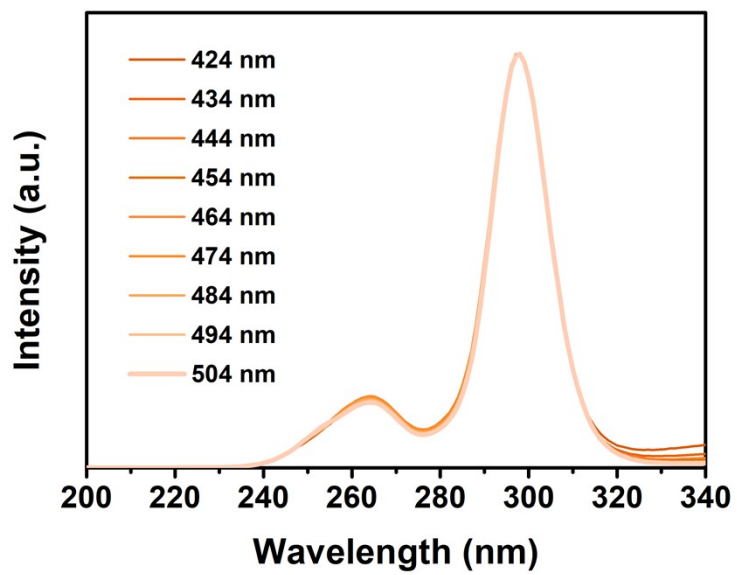

Figure S10. PL excitation (PLE) spectra measured at different emission wavelength.

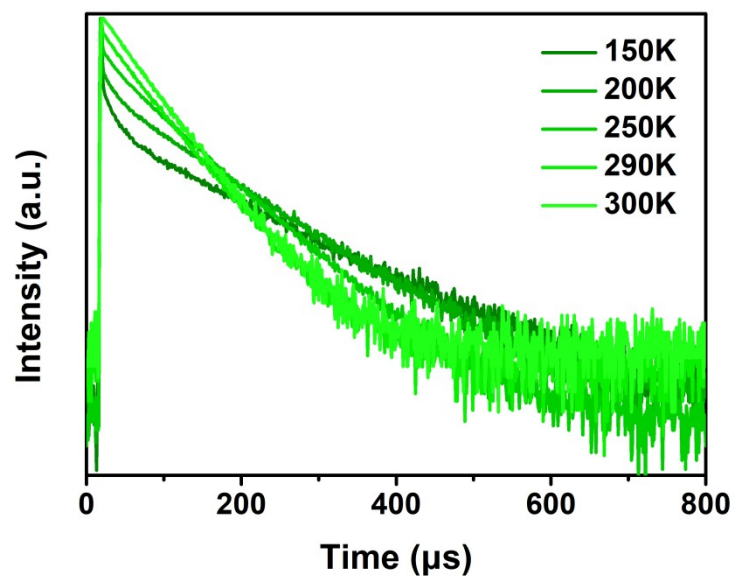

Figure S11. Time-resolved PL decay curves of  $\text{Cs}_5\text{Cu}_3\text{Cl}_6\text{I}_2$  NCs.

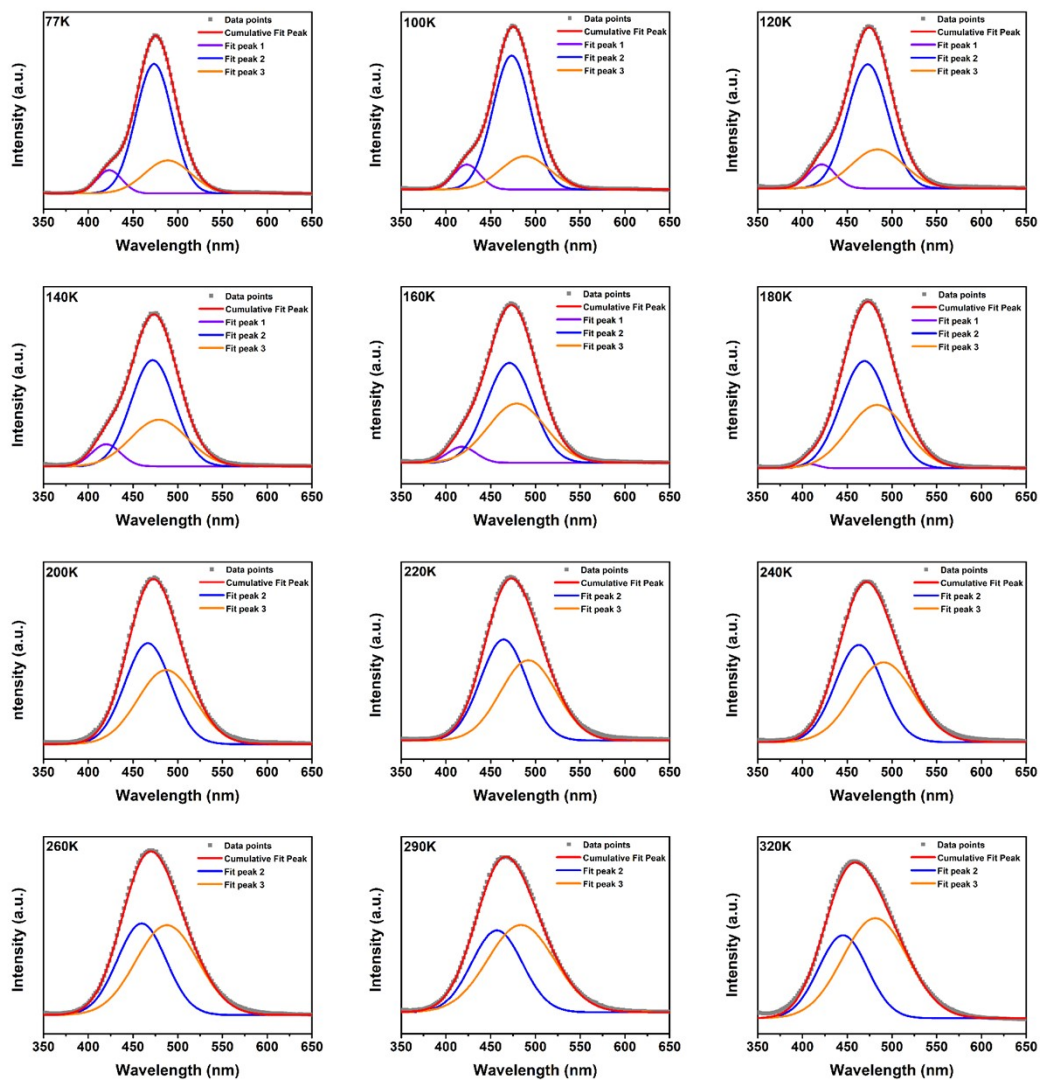

**Figure S12.** The fitted PL spectra by an exponentially modified Gaussian by multiple Gaussian distributions at different temperature.

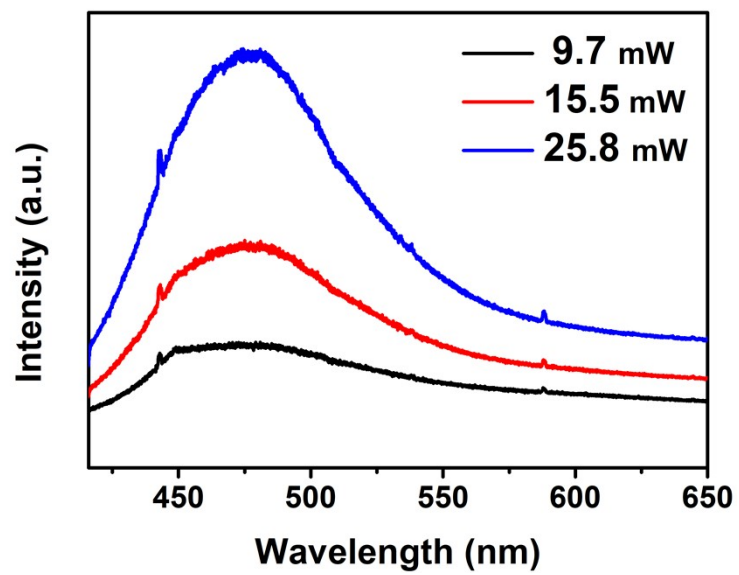

**Figure S13.** The PL spectra of Cs<sub>5</sub>Cu<sub>3</sub>Cl<sub>6</sub>I<sub>2</sub> NCs at different power density.



**Table S1.** Structural and optical characteristics of copper halide perovskites-like materials.

| Compound                                           | Dimension | PL/ nm | Stokes shift/ nm | Polyhedral connection mode    | Structure                                                                             | Reference |
|----------------------------------------------------|-----------|--------|------------------|-------------------------------|---------------------------------------------------------------------------------------|-----------|
| $\text{Cs}_3\text{Cu}_2\text{I}_5$                 | 0D        | 445    | 155              | edge-sharing                  | 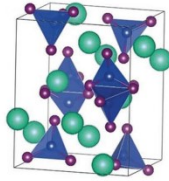   | 1         |
| $(\text{MA})_4\text{Cu}_2\text{Br}_6$              |           | 524    | 222              |                               |    | 2         |
| $(\text{C}_{16}\text{H}_{36}\text{N})\text{CuI}_2$ |           | 463    | 183              |                               |    | 3         |
| $\text{CsCu}_2\text{I}_3$                          | 1D        | 568    | 240              | edge-sharing                  |    | 4         |
| $\text{Rb}_2\text{CuCl}_3$                         |           | 395    | 93               | corner-sharing                |  | 5         |
| $\text{Rb}_2\text{CuBr}_3$                         |           | 385    | 85               | corner-sharing                |  | 5         |
| $[\text{KC}_2]_2[\text{Cu}_4\text{I}_6]$           |           | 545    | 145              | edge-sharing and face-sharing |  | 6         |

## References

- [1] T. Jun, K. Sim, S. Iimura, M. Sasase, H. Kamioka, J. Kim, H. Hosono, *Adv. Mater.* 2018, **30**, 1804547.
- [2] H. Peng, S. Yao, Y. Guo, R. Zhi, X. Wang, F. Ge, Y. Tian, J. Wang, B. Zou, *J Phys Chem Lett* 2020, **11**, 4703-4710.
- [3] X. Liu, F. Yuan, C. Zhu, J. Li, X. Lv, G. Xing, Q. Wei, G. Wang, J. Dai, H. Dong, J. Xu, B. Jiao, Z. Wu, *Nano Energy* 2022, **91**, 106664.
- [4] R. Lin, Q. Guo, Q. Zhu, Y. Zhu, W. Zheng, F. Huang, *Adv. Mater.* 2019, **31**, 1905079.
- [5] B. Yang, L. Yin, G. Niu, J. H. Yuan, K. H. Xue, Z. Tan, X. S. Miao, M. Niu, X. Du, H. Song, E. Lifshitz, J. Tang, *Adv. Mater.* 2019, **31**, 1904711.
- [6] S. Li, J. Xu, Z. Li, Z. Zeng, W. Li, M. Cui, C. Qin, Y. Du, *Chem. Mater.* 2020, **32**, 6525-6531.
